# Supplementary material for: Lymphatic Filariasis: A Systematic Review on Morbidity and Its Repercussions in Countries in the Americas
Source: MDPI journal article supplement (doi:10.3390/ijerph19010316), 2021-12-28
Supplement: s1 [file s1]

**Table S1:** Quality evaluation of the included quantitative studies.

| Criteria                                                                                                                                       | Studies                          |                                  |                                       |                                  |                                 |                                   |                                    |                                    |
|------------------------------------------------------------------------------------------------------------------------------------------------|----------------------------------|----------------------------------|---------------------------------------|----------------------------------|---------------------------------|-----------------------------------|------------------------------------|------------------------------------|
|                                                                                                                                                | Dreyer <i>et al.</i> , 1987 [50] | Addiss <i>et al.</i> , 1995 [30] | Albuquerque <i>et al.</i> , 1995 [32] | Norões <i>et al.</i> , 1996 [34] | Braga <i>et al.</i> , 1997 [33] | Vincent <i>et al.</i> , 1998 [49] | Dreyer <i>et al.</i> , 1999 A [43] | Dreyer <i>et al.</i> , 1999 B [35] |
| Question/objective sufficiently described?                                                                                                     | 0                                | 2                                | 2                                     | 2                                | 2                               | 2                                 | 1                                  | 2                                  |
| Study design evident and appropriate?                                                                                                          | 1                                | 2                                | 2                                     | 2                                | 2                               | 2                                 | 2                                  | 2                                  |
| Method of subject/comparison group selection or source of information/input variables described and appropriate?                               | 1                                | 2                                | 2                                     | 1                                | 1                               | 1                                 | 1                                  | 1                                  |
| Subject (and comparison group, if applicable) characteristics sufficiently described?                                                          | 1                                | 1                                | 2                                     | 1                                | 1                               | 1                                 | 1                                  | 1                                  |
| If interventional and random allocation was possible, was it described?                                                                        | N/A                              | N/A                              | N/A                                   | N/A                              | N/A                             | N/A                               | N/A                                | N/A                                |
| If interventional and blinding of investigators was possible, was it reported?                                                                 | N/A                              | N/A                              | N/A                                   | N/A                              | N/A                             | N/A                               | N/A                                | N/A                                |
| If interventional and blinding of subjects was possible, was it reported?                                                                      | N/A                              | N/A                              | N/A                                   | N/A                              | N/A                             | N/A                               | N/A                                | N/A                                |
| Outcome and (if applicable) exposure measure(s) well defined and robust to measurement / misclassification bias? Means of assessment reported? | 1                                | 1                                | 1                                     | 1                                | 1                               | 1                                 | 1                                  | 1                                  |
| Sample size appropriate?                                                                                                                       | 1                                | 1                                | 2                                     | 1                                | 2                               | 1                                 | 1                                  | 2                                  |
| Analytic methods described/justified and appropriate?                                                                                          | 0                                | 2                                | 2                                     | 1                                | 2                               | 2                                 | 0                                  | 2                                  |
| Some estimate of variance is reported for the main results?                                                                                    | 1                                | 1                                | 1                                     | 1                                | 1                               | 2                                 | 1                                  | 1                                  |
| Controlled for confounding?                                                                                                                    | 0                                | 0                                | 0                                     | 0                                | 0                               | 0                                 | 0                                  | 0                                  |
| Results reported in sufficient detail?                                                                                                         | 1                                | 2                                | 2                                     | 2                                | 2                               | 2                                 | 1                                  | 2                                  |
| Conclusions supported by the results?                                                                                                          | 1                                | 2                                | 2                                     | 2                                | 2                               | 1                                 | 2                                  | 1                                  |
| <b>Maximum points</b>                                                                                                                          | 22                               | 22                               | 22                                    | 22                               | 22                              | 22                                | 22                                 | 22                                 |
| <b>Total points</b>                                                                                                                            | 08                               | 16                               | 18                                    | 14                               | 16                              | 15                                | 13                                 | 15                                 |
| <b>Summary score (%)</b>                                                                                                                       | 36                               | 73                               | 82                                    | 64                               | 73                              | 68                                | 59                                 | 68                                 |

0 if the response is 'no'; 1 if the response is 'partial'; 2 if the response is 'yes'; followed by N/A if not applicable.

**Table S1:** Quality evaluation of the included quantitative studies.

| Criteria                                                                                                                                       | Studies                          |                                  |                                  |                                |                             |                                  |                                   |                                  |
|------------------------------------------------------------------------------------------------------------------------------------------------|----------------------------------|----------------------------------|----------------------------------|--------------------------------|-----------------------------|----------------------------------|-----------------------------------|----------------------------------|
|                                                                                                                                                | Dreyer <i>et al.</i> , 2002 [21] | Bonfim <i>et al.</i> , 2003 [36] | Norões <i>et al.</i> , 2003 [25] | Wilson <i>et al.</i> 2004 [66] | Fox <i>et al.</i> 2005 [47] | Dreyer <i>et al.</i> 2006 A [46] | McPherson <i>et al.</i> 2006 [48] | Medeiros <i>et al.</i> 2006 [37] |
| Question/objective sufficiently described?                                                                                                     | 1                                | 2                                | 2                                | 2                              | 2                           | 2                                | 2                                 | 2                                |
| Study design evident and appropriate?                                                                                                          | 2                                | 2                                | 2                                | 1                              | 2                           | 1                                | 1                                 | 2                                |
| Method of subject/comparison group selection or source of information/input variables described and appropriate?                               | 2                                | 2                                | 1                                | 2                              | 1                           | 1                                | 0                                 | 2                                |
| Subject (and comparison group, if applicable) characteristics sufficiently described?                                                          | 1                                | 1                                | 1                                | 1                              | 2                           | 2                                | 0                                 | 1                                |
| If interventional and random allocation was possible, was it described?                                                                        | N/A                              | N/A                              | N/A                              | N/A                            | N/A                         | N/A                              | N/A                               | N/A                              |
| If interventional and blinding of investigators was possible, was it reported?                                                                 | N/A                              | N/A                              | N/A                              | N/A                            | N/A                         | N/A                              | 0                                 | 0                                |
| If interventional and blinding of subjects was possible, was it reported?                                                                      | N/A                              | N/A                              | N/A                              | N/A                            | N/A                         | N/A                              | N/A                               | N/A                              |
| Outcome and (if applicable) exposure measure(s) well defined and robust to measurement / misclassification bias? Means of assessment reported? | 1                                | 1                                | 1                                | 2                              | 2                           | 2                                | 1                                 | 2                                |
| Sample size appropriate?                                                                                                                       | 2                                | 2                                | 1                                | 2                              | 2                           | 2                                | 1                                 | 2                                |
| Analytic methods described/justified and appropriate?                                                                                          | 2                                | 1                                | 2                                | 2                              | 2                           | 2                                | 2                                 | 1                                |
| Some estimate of variance is reported for the main results?                                                                                    | 1                                | 2                                | 2                                | 1                              | 2                           | 2                                | 2                                 | 2                                |
| Controlled for confounding?                                                                                                                    | 0                                | 0                                | 0                                | N/A                            | N/A                         | N/A                              | 0                                 | N/A                              |
| Results reported in sufficient detail?                                                                                                         | 2                                | 2                                | 2                                | 2                              | 2                           | 2                                | 1                                 | 2                                |
| Conclusions supported by the results?                                                                                                          | 2                                | 2                                | 2                                | 2                              | 2                           | 2                                | 2                                 | 2                                |
| <b>Maximum points</b>                                                                                                                          | 22                               | 22                               | 22                               | 20                             | 20                          | 20                               | 24                                | 22                               |
| <b>Total points</b>                                                                                                                            | 16                               | 17                               | 17                               | 17                             | 19                          | 18                               | 12                                | 18                               |
| <b>Summary score (%)</b>                                                                                                                       | 73                               | 77                               | 77                               | 85                             | 95                          | 90                               | 50                                | 82                               |

0 if the response is 'no'; 1 if the response is 'partial'; 2 if the response is 'yes'; followed by N/A if not applicable.

**Table S1:** Quality evaluation of the included quantitative studies.

| Criteria                                                                                                                                       | Studies                           |                                         |                                |                                  |                                 |                                 |                                 |                                  |
|------------------------------------------------------------------------------------------------------------------------------------------------|-----------------------------------|-----------------------------------------|--------------------------------|----------------------------------|---------------------------------|---------------------------------|---------------------------------|----------------------------------|
|                                                                                                                                                | Freitas <i>et al.</i> , 2008 [40] | Aguiar-Santos <i>et al.</i> , 2009 [27] | Norões <i>et al.</i> 2009 [41] | Norões <i>et al.</i> , 2010 [42] | Rocha <i>et al.</i> , 2010 [39] | Netto <i>et al.</i> , 2016 [38] | Santana <i>et al.</i> 2016 [52] | Soares <i>et al.</i> , 2016 [65] |
| Question/objective sufficiently described?                                                                                                     | 2                                 | 2                                       | 2                              | 2                                | 2                               | 2                               | 2                               | 2                                |
| Study design evident and appropriate?                                                                                                          | 1                                 | 2                                       | 2                              | 2                                | 1                               | 1                               | 2                               | 2                                |
| Method of subject/comparison group selection or source of information/input variables described and appropriate?                               | 2                                 | 2                                       | 1                              | 2                                | 1                               | 2                               | 2                               | 2                                |
| Subject (and comparison group, if applicable) characteristics sufficiently described?                                                          | 0                                 | 1                                       | 1                              | 2                                | 1                               | 1                               | 2                               | 1                                |
| If interventional and random allocation was possible, was it described?                                                                        | N/A                               | N/A                                     | N/A                            | N/A                              | N/A                             | N/A                             | N/A                             | 2                                |
| If interventional and blinding of investigators was possible, was it reported?                                                                 | N/A                               | N/A                                     | N/A                            | N/A                              | N/A                             | N/A                             | N/A                             | 1                                |
| If interventional and blinding of subjects was possible, was it reported?                                                                      | N/A                               | N/A                                     | N/A                            | N/A                              | N/A                             | N/A                             | N/A                             | 0                                |
| Outcome and (if applicable) exposure measure(s) well defined and robust to measurement / misclassification bias? Means of assessment reported? | 1                                 | 2                                       | 2                              | 2                                | 2                               | 2                               | 1                               | 2                                |
| Sample size appropriate?                                                                                                                       | 2                                 | 2                                       | 2                              | 2                                | 1                               | 2                               | 1                               | 2                                |
| Analytic methods described/justified and appropriate?                                                                                          | 0                                 | N/A                                     | N/A                            | 2                                | 1                               | 2                               | 2                               | 2                                |
| Some estimate of variance is reported for the main results?                                                                                    | 0                                 | N/A                                     | N/A                            | 2                                | 1                               | 2                               | 2                               | 1                                |
| Controlled for confounding?                                                                                                                    | N/A                               | N/A                                     | N/A                            | N/A                              | 0                               | N/A                             | N/A                             | 0                                |
| Results reported in sufficient detail?                                                                                                         | 1                                 | 2                                       | 2                              | 2                                | 1                               | 2                               | 2                               | 1                                |
| Conclusions supported by the results?                                                                                                          | 2                                 | 2                                       | 2                              | 2                                | 2                               | 2                               | 2                               | 2                                |
| <b>Maximum points</b>                                                                                                                          | 20                                | 16                                      | 16                             | 20                               | 22                              | 20                              | 20                              | 28                               |
| <b>Total points</b>                                                                                                                            | 11                                | 15                                      | 14                             | 20                               | 13                              | 18                              | 18                              | 20                               |
| <b>Summary score (%)</b>                                                                                                                       | 55                                | 94                                      | 88                             | 100                              | 59                              | 90                              | 90                              | 71                               |

0 if the response is 'no'; 1 if the response is 'partial'; 2 if the response is 'yes'; followed by N/A if not applicable.
