# Supplementary material for: Lymphatic Filariasis: A Systematic Review on Morbidity and Its Repercussions in Countries in the Americas
Source: MDPI journal article supplement (doi:10.3390/ijerph19010316), 2021-12-28
Supplement: s1 [file s1]

**Table S2:** Quality evaluation of the included qualitative studies.

| Criteria                                                       | Studies                             |                                         |                                     |                                       |                                  |                                     |
|----------------------------------------------------------------|-------------------------------------|-----------------------------------------|-------------------------------------|---------------------------------------|----------------------------------|-------------------------------------|
|                                                                | Coreil <i>et al.</i> ,<br>1998 [15] | Mc Pherson <i>et al.</i> ,<br>2003 [12] | Coreil <i>et al.</i> ,<br>2006 [14] | Dreyer <i>et al.</i> ,<br>2006 B [18] | Person <i>et al.</i> 2006<br>[8] | Person <i>et al.</i><br>2007 A [10] |
| Question/objective sufficiently described?                     | 2                                   | 2                                       | 2                                   | 1                                     | 2                                | 2                                   |
| Study design evident and appropriate?                          | 2                                   | 2                                       | 2                                   | 1                                     | 1                                | 2                                   |
| Context for the study clear?                                   | 2                                   | 2                                       | 2                                   | 2                                     | 2                                | 2                                   |
| Connection to a theoretical framework/wider body of knowledge? | 2                                   | 2                                       | 2                                   | 2                                     | 2                                | 2                                   |
| Sampling strategy described, relevant and justified?           | 2                                   | 1                                       | 1                                   | 0                                     | 2                                | 1                                   |
| Data collection methods clearly described and systematic?      | 1                                   | 2                                       | 1                                   | 0                                     | 2                                | 2                                   |
| Data analysis clearly described and systematic?                | 1                                   | 2                                       | 1                                   | 0                                     | 2                                | 1                                   |
| Use of verification procedure(s) to establish credibility?     | 1                                   | 0                                       | 1                                   | 0                                     | 0                                | 0                                   |
| Conclusions supported by the results?                          | 1                                   | 2                                       | 2                                   | 2                                     | 2                                | 2                                   |
| Reflexivity of the account?                                    | 2                                   | 0                                       | 0                                   | 0                                     | 0                                | 0                                   |
| Maximum points                                                 | 20                                  | 20                                      | 20                                  | 20                                    | 20                               | 20                                  |
| Total points                                                   | 16                                  | 15                                      | 14                                  | 8                                     | 15                               | 14                                  |
| Summary score (%)                                              | 80                                  | 75                                      | 70                                  | 40                                    | 75                               | 70                                  |

0 if the response is ‘no’; 1 if the response is ‘partial’; 2 if the response is ‘yes’ followed by N/A if not applicable.

**Table S2:** Quality evaluation of the included qualitative studies.

| Criteria                                                       | Studies                         |                                |                                |                    |                                 |
|----------------------------------------------------------------|---------------------------------|--------------------------------|--------------------------------|--------------------|---------------------------------|
|                                                                | Person <i>et al.</i> 2007 B [9] | Person <i>et al.</i> 2009 [11] | Tyrell <i>et al.</i> 2013 [13] | Hettrick 2017 [31] | Pedrosa <i>et al.</i> 2019 [16] |
| Question/objective sufficiently described?                     | 2                               | 1                              | 2                              | 1                  | 2                               |
| Study design evident and appropriate?                          | 2                               | 2                              | 2                              | 1                  | 2                               |
| Context for the study clear?                                   | 2                               | 2                              | 2                              | 2                  | 2                               |
| Connection to a theoretical framework/wider body of knowledge? | 2                               | 2                              | 2                              | 2                  | 2                               |
| Sampling strategy described, relevant and justified?           | 1                               | 1                              | 1                              | 0                  | 2                               |
| Data collection methods clearly described and systematic?      | 2                               | 2                              | 1                              | 0                  | 2                               |
| Data analysis clearly described and systematic?                | 1                               | 1                              | 2                              | 0                  | 2                               |
| Use of verification procedure(s) to establish credibility?     | 0                               | 0                              | 0                              | 0                  | 0                               |
| Conclusions supported by the results?                          | 2                               | 2                              | 2                              | 2                  | 2                               |
| Reflexivity of the account?                                    | 0                               | 0                              | 0                              | 0                  | 0                               |
| Maximum points                                                 | 20                              | 20                             | 20                             | 20                 | 20                              |
| Total points                                                   | 14                              | 13                             | 14                             | 8                  | 16                              |
| Summary score (%)                                              | 70                              | 65                             | 70                             | 40                 | 80                              |

0 if the response is ‘no’; 1 if the response is ‘partial’; 2 if the response is ‘yes’ followed by N/A if not applicable.
